# Supplementary material
Source: Springer Nature journal article supplement (https://www.springermedizin.de/resource/supplementary/12936_2012_2511_MOESM3_ESM.pdf/9543116)

**Day 1**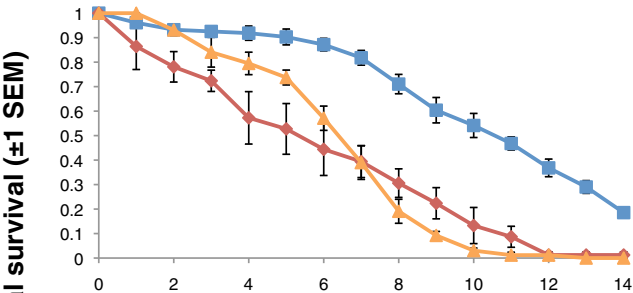**Month 1**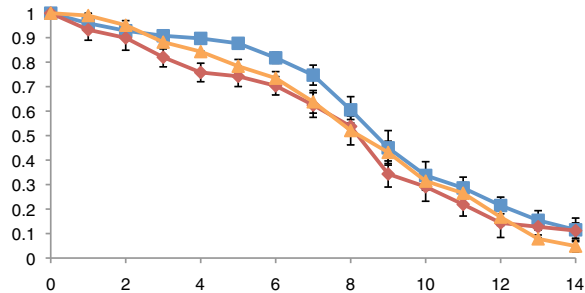**Month 2**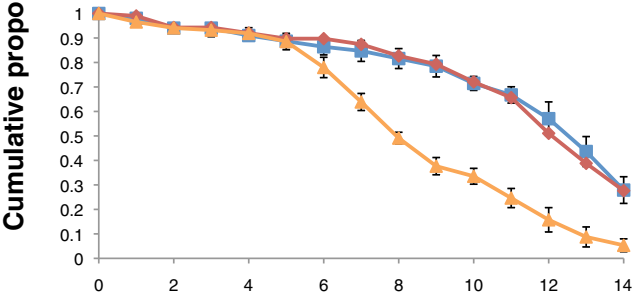**Month 3**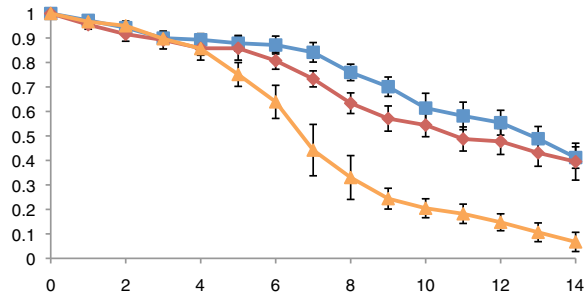**Day after application**

Supplement: MOESM3 [file 9543116]
